# Supplementary material for: Elusive Recurrent Bacterial Contamination in a Diatom Culture: A Case Study
Source: MDPI journal article supplement (doi:10.3390/app112110131), 2021-10-28

**Supplementary Figure S1A:** a maximum likelihood phylogenetic tree built on alignment columns corresponding to 16S amplicon. All strains associated with *F. radians* are shown in blue.

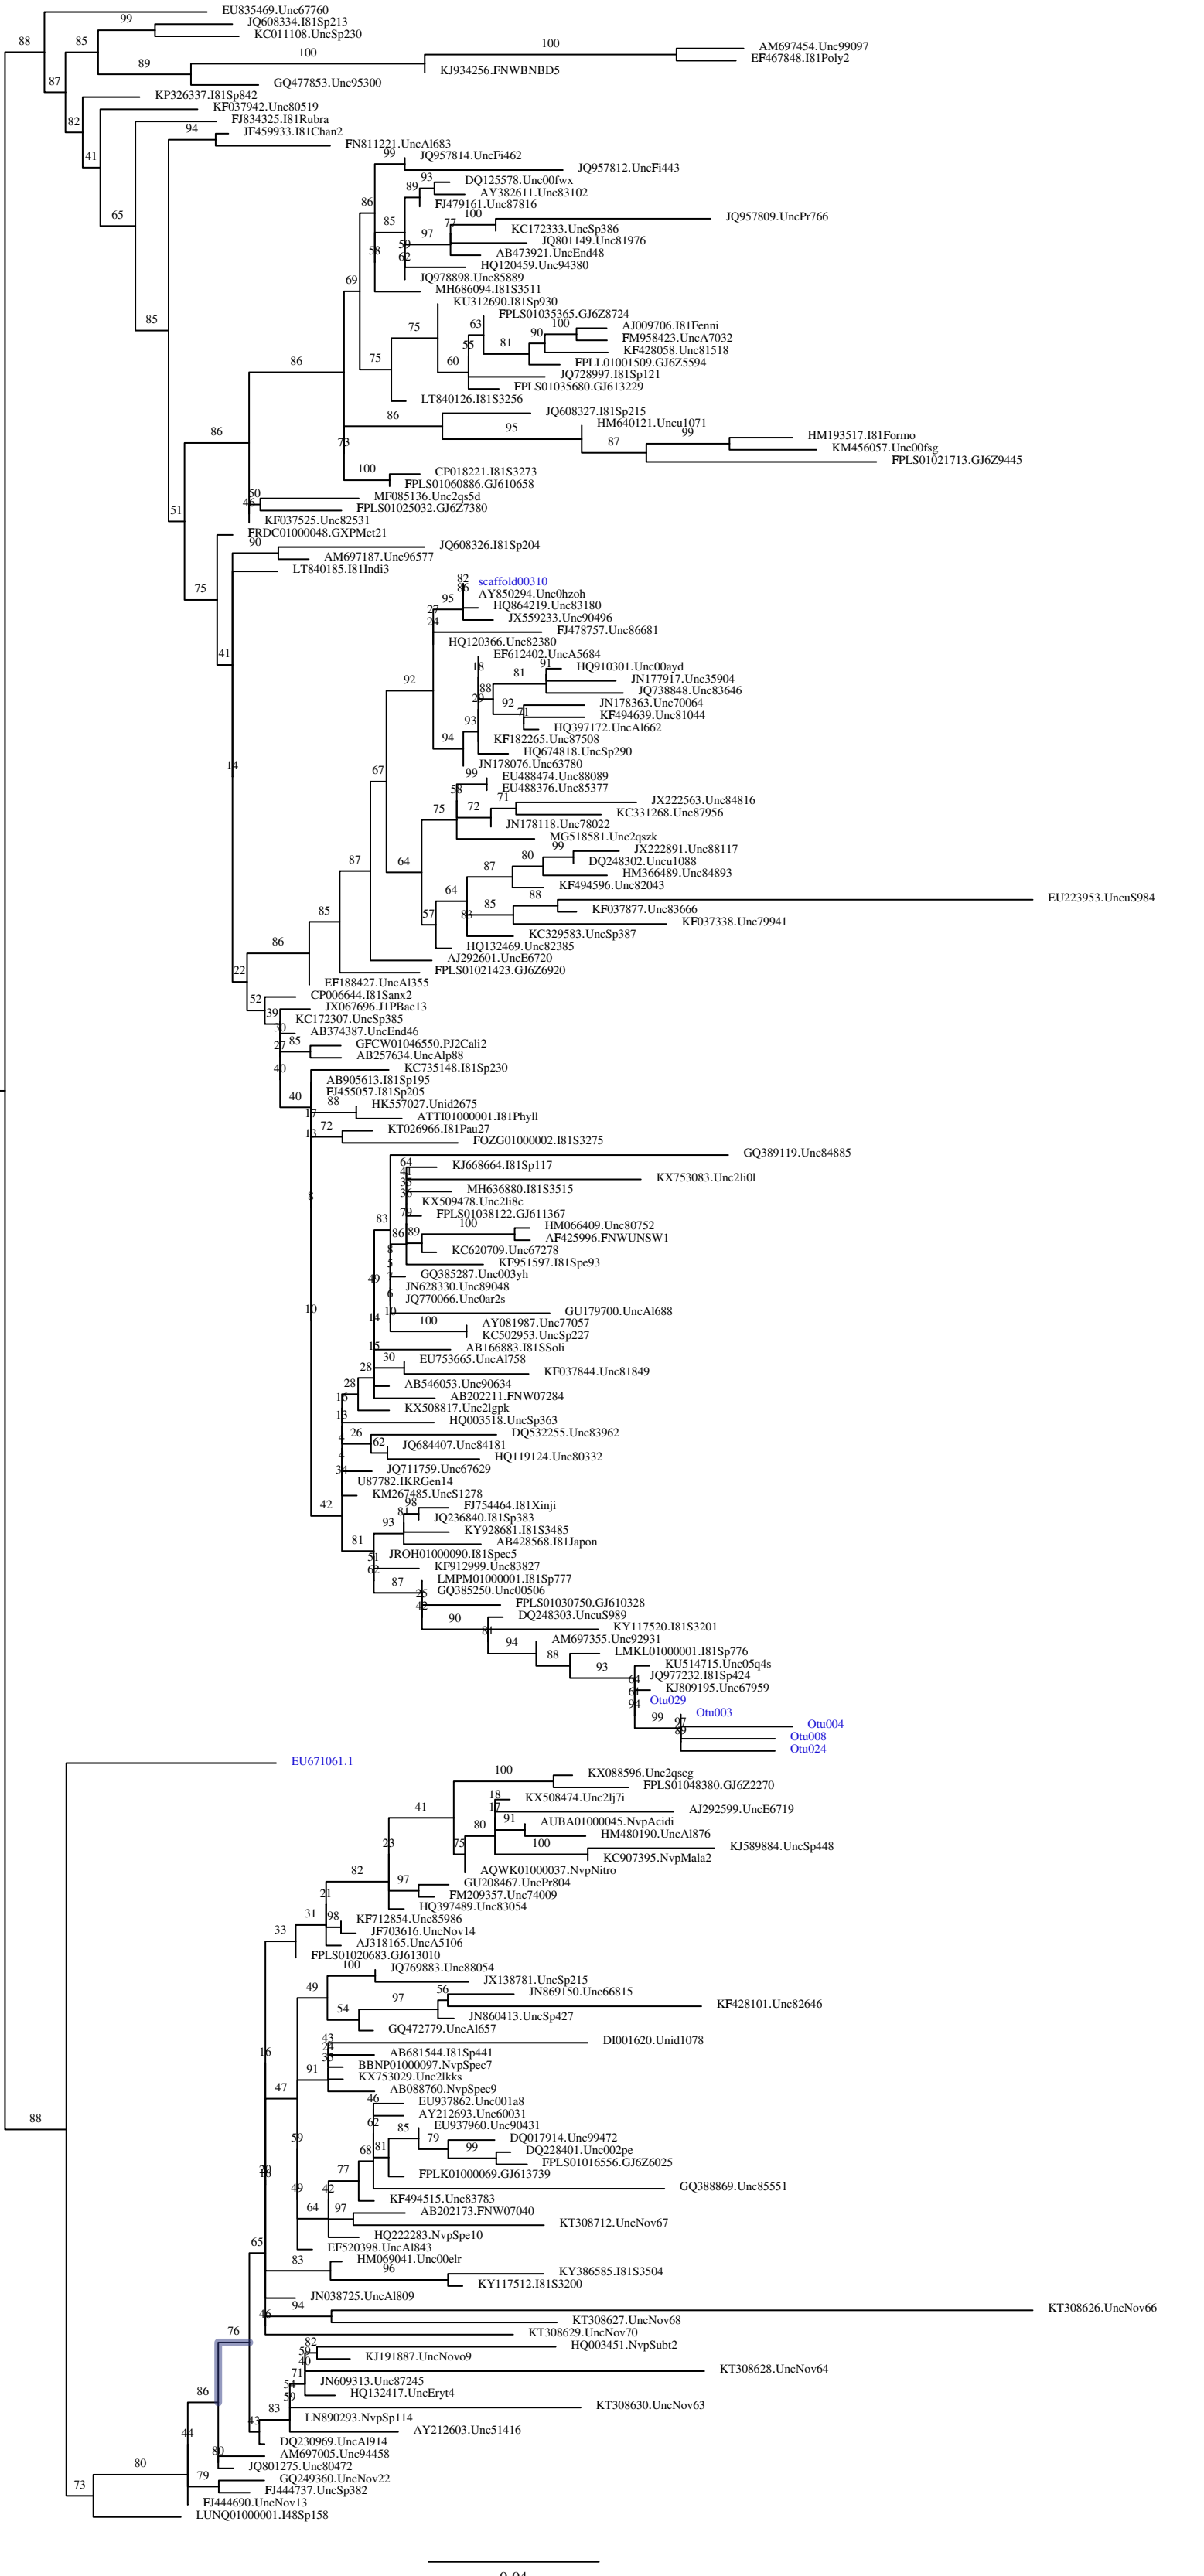

0.04

**Supplementary Figure S1B:** a maximum likelihood phylogenetic tree built on a complete 16S alignment. All strains associated with *F. radians* are shown in blue.

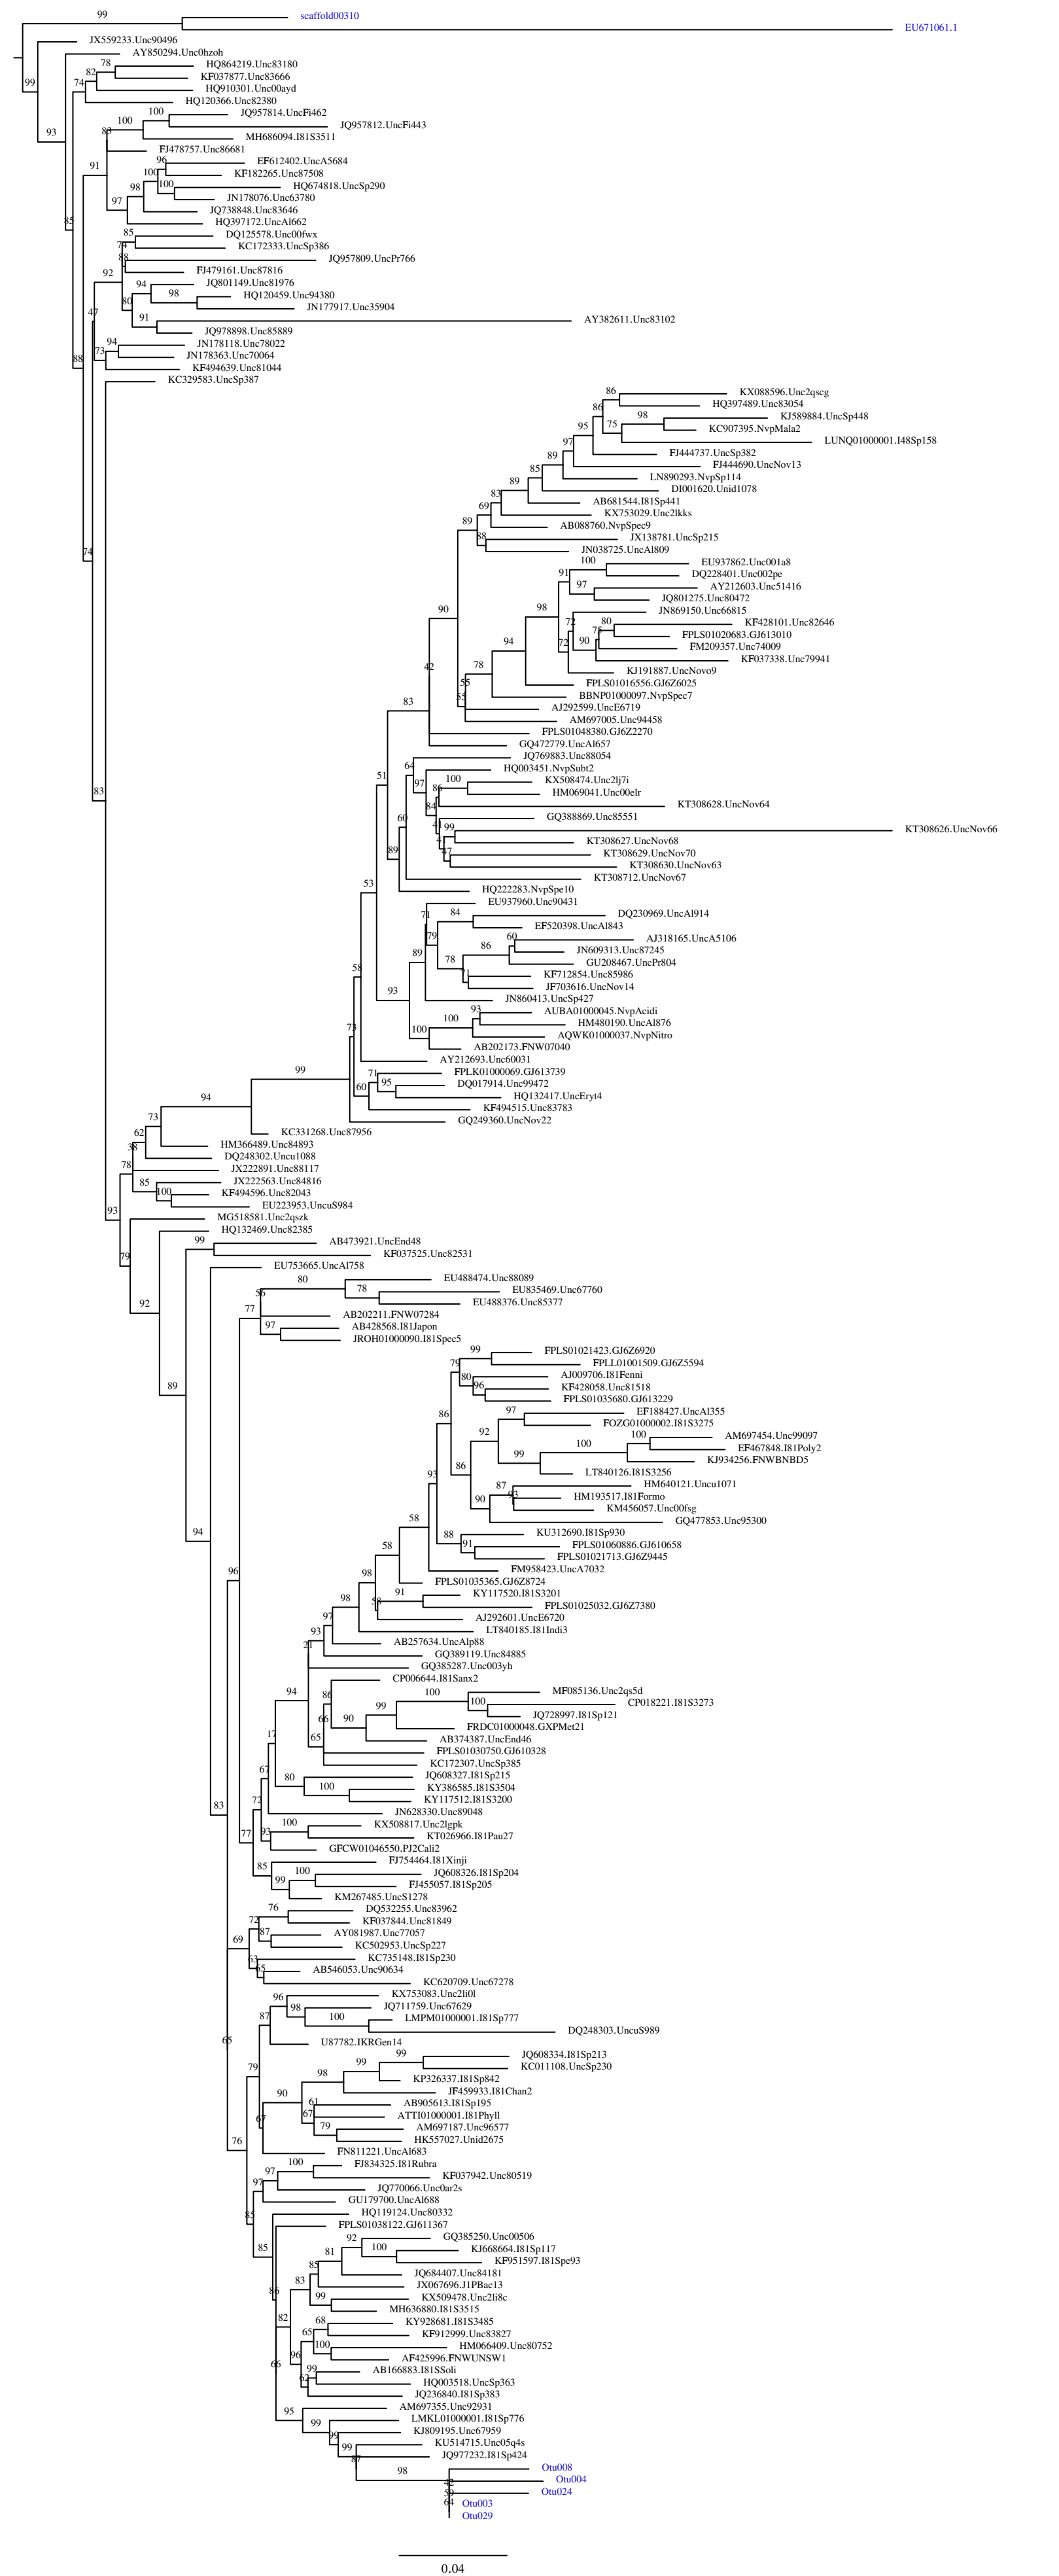

Supplement: s1 [file s1]
